1 **Gut Mycobiome Dysbiosis Is Linked to Hypertriglyceridemia among Home**  
2 **Dwelling Elderly Danes**

3 Hajar Fauzan Ahmad<sup>1,2</sup>, Josue Leonardo Castro Mejia<sup>1</sup>, Lukasz Krych<sup>1</sup>, Bekzod  
4 Khakimov<sup>1</sup>, Witold Kot<sup>3</sup>, Rasmus Leidesdorff Bechshøft<sup>4,5</sup>, Søren Reitelseder<sup>4,5</sup>,  
5 Grith Westergaard Højfeldt<sup>4,5</sup>, Søren Balling Engelsen<sup>1</sup>, Lars Holm<sup>6</sup>, Karoline Faust<sup>7</sup>,  
6 and Dennis Sandris Nielsen<sup>1</sup>

7

8 <sup>1</sup> Department of Food Science, Faculty of Science, University of Copenhagen,  
9 Frederiksberg, Denmark.

10 <sup>2</sup> Faculty of Industrial Sciences and Technology, Department of Industrial  
11 Biotechnology, Universiti Malaysia Pahang, Pahang, Malaysia.

12 <sup>3</sup>Department of Environmental Science, Aarhus University, Roskilde, Denmark.

13 <sup>4</sup> Institute of Sports Medicine Copenhagen, Department of Orthopedic Surgery M,  
14 Bispebjerg Hospital, Copenhagen, NV, Denmark.

15 <sup>5</sup>Department of Biomedical Sciences, Faculty of Health and Medical Sciences,  
16 University of Copenhagen, Copenhagen, Denmark.

17 <sup>6</sup>School of Sport, Exercise and Rehabilitation Sciences, University of Birmingham,  
18 Birmingham, United Kingdom.

19 <sup>7</sup>Department of Microbiology and Immunology, Rega Institute, KU Leuven, Leuven,  
20 Belgium.

21

22 \* Correspondence to Hajar Fauzan Ahmad ([fauzanahmad@ump.edu.my](mailto:fauzanahmad@ump.edu.my)) and Dennis  
23 Sandris Nielsen ([dn@food.ku.dk](mailto:dn@food.ku.dk))

24

25

26 Email addresses:

27 HFA [fauzanahmad@ump.edu.my](mailto:fauzanahmad@ump.edu.my)

28 JLC [jcame@food.ku.dk](mailto:jcame@food.ku.dk)

29 ŁK [krych@food.ku.dk](mailto:krych@food.ku.dk)

30 BK [bzo@food.ku.dk](mailto:bzo@food.ku.dk)

31 WK [wk@envs.au.dk](mailto:wk@envs.au.dk)

32 RLB [r.bechshoeft@gmail.com](mailto:r.bechshoeft@gmail.com)

33 SR [s.reitelseder@gmail.com](mailto:s.reitelseder@gmail.com)

34 GWH [grith.westergaard.hoejfeldt.01@regionh.dk](mailto:grith.westergaard.hoejfeldt.01@regionh.dk)

35 SBE [se@food.ku.dk](mailto:se@food.ku.dk)

36 LH [l.holm@bham.ac.uk](mailto:l.holm@bham.ac.uk)

37 KF [karoline.faust@kuleuven.be](mailto:karoline.faust@kuleuven.be)

38 DSN [dn@food.ku.dk](mailto:dn@food.ku.dk)

39

40

41

42

43

44

45 **ABSTRACT**

46 Gut microbial dysbiosis have been in the etiology of a number of diseases, yet  
47 the presence of fungal communities and their possible association with host health are  
48 little understood. This study attempts to identify gut microbial fungal associations  
49 with the progression of atherogenic dyslipidemia in a population of older adults by  
50 investigating the interplay between dietary intake, gut mycobiome composition,

51 plasma and fecal metabolome and anthropometric/body-composition measurements of  
52 100 Danes aged 65 to 81 ( $69.57 \pm 3.64$ ) years. The gut mycobiome composition were  
53 determined by high-throughput sequencing of internal transcribed spacer (ITS2) gene  
54 amplicons, while the plasma and fecal metabolome was determined by GC-TOF-MS.  
55 The gut microbiome of the subjects investigated is home to three main eukaryotic  
56 phyla, namely Ascomycota, Basidiomycota and Zygomycota, with genera  
57 *Penicillium*, *Candida*, and *Aspergillus* being particularly common.  
58 Hypertriglyceridemia was associated with fewer observed fungal species, and Bray-  
59 Curtis dissimilarity matrix-based analysis showed significant ( $P < 0.05$ ) clustering  
60 according to fasting levels of circulating plasma triglycerides (Tg) and very low-  
61 density lipoprotein (VLDL) cholesterol fasting levels, respectively. Interestingly,  
62 neither hypertriglyceridemia nor elevated VLDL levels were reflected in the  
63 prokaryotic component of the gut microbiome as determined by 16S rRNA gene  
64 amplicon sequencing. Higher levels of Tg and VLDL cholesterol significantly  
65 associates with increased relative abundance of genus *Penicillium*, possibly mediated  
66 by a higher dietary fat intake (ANOVA,  $P < 0.05$ ), and *Aspergillus* and *Guehomyces*  
67 were positively associated with SCFAs groups. Collectively, these findings suggest  
68 that in older adults' gut mycobiome dysbiosis is associated with hypertriglyceridemia,  
69 a known risk factor for development of cardiovascular disease.

70

71 **Keywords:** older-adults, hypertriglyceridemia, dysbiosis, gut mycobiome, host  
72 metabolome, triglyceride, VLDL and dietary fat intake

73

74

75

## 76 INTRODUCTION

77           Some of the major challenges in healthy ageing is the deterioration of body  
78 and functional capabilities, frailty, and metabolic health. Gut microbiota (GM)  
79 dysbiosis has previously been found to be associated with age-related frailty and  
80 declines in the physiology of the gastrointestinal tract due to ageing in elderly people  
81 as well as being a risk factor for metabolic disorders [1]–[6]. Thus, maintaining a  
82 diverse core gut microbiome has been proposed as a possible signature of healthy  
83 ageing [7]–[9].

84           To date, research on the GM of elderly has focused on the bacterial  
85 component largely ignoring fungi, archaea and viruses [3], [10]. However, recent  
86 studies show that fungi have significant effects in the gut milieu despite their small  
87 proportion in number as compared to bacteria [11], and gut mycobiome dysbiosis has  
88 been associated with irritable bowel disease (IBD) [12], obesity [13], and carotid  
89 atherosclerosis vascular disease [14]. The fungal component of the gut microbiome of  
90 healthy individuals has been reported to be dominated by the yeast genera  
91 *Saccharomyces*, *Malassezia*, and *Candida* [15].

92           Age is known as the dominant cardiovascular disease (CVD) risk factor due to  
93 dyslipidaemia in both men and women older than 65 years, as compared to younger  
94 individuals [16]. Further, elevated triglycerides (Tg) and very low density level  
95 (VLDL) cholesterol levels have been associated with subclinical atherosclerosis and  
96 dubbed as independent risk factors for CVD [17]. Several large studies suggest that  
97 hypertriglyceridemia is related to increased levels of remnant lipoproteins in  
98 promoting atherogenesis [18], [19]. The possible mechanisms for this association  
99 include excessive free fatty acid release, production of proinflammatory cytokines,  
100 coagulation factors, and impaired fibrinolysis [20]. Similarly, Tg are also synthesized

101 from free fatty acids and glycerol in hepatocytes and then, together with apoB, they  
102 form VLDL particles [21].

103 Here, we report the gut fungal composition, dietary intake, fecal and plasma  
104 metabolome, and anthropometric/body-composition measurements among 100  
105 older adult Danes aged 65-81 years and relate this to hypertriglyceridemia (Tg >  
106 1.70 mmol/l ). We observed that the fecal mycobiome distribution is strongly  
107 associated with variations in Tg and VLDL cholesterol plasma levels.

108

## 109 **MATERIALS AND METHODS**

### 110 **Study Design and Participants Recruitment**

111 Participants for this study consisted of 100 older adult Danes from the  
112 Counteracting Age-related Loss of skeletal Muscle mass (CALM) cohort. The details  
113 about the inclusion criteria has been described elsewhere [22]. All experiments were  
114 performed in accordance with the Declaration of Helsinki II and approved by The  
115 Danish Regional Committees of the Capital Region (number H-4-2013-070) and with  
116 informed consent from all participants, registered at ClinicalTrials.gov  
117 (NCT02034760), and data protected under Danish Data Protection Agency 2012-58-  
118 0004 – BBH-2015-001 I-Suite.

### 119 **Sample Collection and Processing**

120 Fecal samples were collected at admission into the cohort. Every sample was  
121 placed in an insulated bag with freezer elements until delivery at Bispebjerg Hospital,  
122 Copenhagen, Denmark, within 24 hours. The container was stored at -60°C until  
123 analysis. In brief, the fecal samples were thawed at 4°C, re-suspended in autoclaved  
124 Milli-Q water (1:2 feces/water) prior homogenization for 1 min at high speed (Lab  
125 Seward, BA7021). The homogenized fecal samples were aliquoted in 2 mL vials for

126 usage in this study [22]. For gut microbiome characterization, 200 mg of the fecal  
127 pellet was recovered for DNA extraction using the standard protocol from the  
128 PowerSoil® DNA Isolation Kit (MOBIO Laboratories, Carlsbad, CA, USA)  
129 supplemented with a bead beating step (FastPrep) to enhance cell lysis. Quality and  
130 concentration of isolated DNA was measured using NanoDrop 1000  
131 Spectrophotometer (Thermo-Fisher, DE, USA), and was stored at – 20 °C until later  
132 use.

### 133 **The internal transcribed spacer 2 (ITS2) Amplification and Sequencing**

134 The gut mycobiome composition was determined using Illumina MiSeq based  
135 sequencing of ITS2 gene region amplicons with adapters compatible for the Nextera  
136 Index Kit® (Illumina, CA, USA). For ITS2, the primers used were ITS3\_F: 5'- TCG  
137 TCG GCA GCG TCA GAT GTG TAT AAG AGA CAG GCA TCG ATG AAG  
138 AAC GCA GC -3' and ITS4\_R: 5'- GTC TCG TGG GCT CGG AGA TGT GTA  
139 TAA GAG ACA GTC CTC CGC TTA TTG ATA TGC -3' [23]. The 1<sup>st</sup> PCR  
140 reaction was performed on a SureCycler 8800 (Agilent Technologies, Santa Clara,  
141 USA) using the following temperature profile: denaturation at 95°C for 5 min; 33  
142 cycles of 95°C for 20 s, 56°C for 30 s and 68°C for 45 s; followed by final elongation  
143 at 68°C for 5 min, while barcoding (2nd PCR) was performed at 98°C for 1 min; 12  
144 cycles of 98°C for 10 s, 55°C for 20 s and 72°C for 20 s; elongation at 72°C for 5  
145 min. Amplicon concentrations was determined using Qubit® dsDNA BR Assay Kit  
146 (Life Technologies, CA, USA) using a Varioskan Flash Multimode Reader (Thermo  
147 Fischer Scientific, MA, USA) at 485/530 nm. Samples were pooled in equimolar  
148 concentrations and sequenced on a MiSeq platform (Illumina, CA, USA) using the  
149 V3, 2x250bp MID pair-ended kit chemistry.

150 **Blood Clinical Parameters, Stool Metabolome and 16S rRNA Gene Amplicon**

151 **High Throughput Sequencing Data**

152 Phenotypic and blood clinical parameters, stool and plasma metabolome, 3-  
153 days weighted dietary records, and 16S rRNA gene amplicon sequencing have been  
154 reported previously [24] but here, we integrated these data with gut mycobiome  
155 compositional data.

156 **Bioinformatics and Statistical Analysis**

157 For the ITS2 amplicons, the raw dataset containing forward reads with  
158 corresponding quality scores were trimmed using USEARCH (v6.1) [25]. High  
159 quality sequences were subsequently de-replicated, filtered from chimeric reads and  
160 *de novo* Operational Taxonomic Units (OTU), with 97% similarity were constructed  
161 using the UPARSE pipeline [26]. UNITE was used as reference database for ITS2  
162 amplicons [27]. The Unassigned taxa were then manually re-checked for the best hit  
163 as referred to the NCBI nucleotide collection (nr/nt) database using BLAST [28].  
164 Furthermore, the OTUs belonging to plants and Agaricomycetes [29] were manually  
165 filtered out as they were identified as common in diet.

166 Samples were rarefied to 1427 reads per sample, unless otherwise noted, based  
167 on rarefaction analysis to optimize the number of sequences per sample without  
168 losing too many samples from the dataset (25 samples had less than 1427 reads after  
169 removing plant DNA and were thus discarded). Downstream analyses of alpha- and  
170 beta-diversity were carried out using QIIME (v1.9 and v1.8) [30].

171 The relative distribution of the mycobiome genera registered in 100 samples  
172 was calculated, unified and summarized in genus level OTU tables. Alpha diversity  
173 measures were expressed as observed species, PD whole tree, and chao1 (sequence  
174 similarity 97% OTUs) computed for rarefied OTU tables using the alpha rarefaction

175 workflow. Differences in alpha diversity were determined using a *t*-test-based  
176 approach employing the non-parametric (Monte Carlo) method (999 permutations)  
177 implemented in the compare alpha diversity workflow. Bray-Curtis dissimilarity  
178 matrix were calculated and visualized via Principal Coordinate Analysis (PCoA) as  
179 previously described and ADONIS was used to evaluate group differences [31], [32].  
180 Additionally, analysis and visualization of microbiome communities was conducted  
181 in R version 3.4.3. Plots were made using ggplot2 package version 2.2.1. Significant  
182 differences in the level of Tg between the groups were assessed using Welch's test.  
183 Correlation between the variables was computed by Spearman Rank correlation.  
184       Differentially abundant taxa were determined by LEfSe analysis [33]. Only  
185 functional categories with log LDA scores of >2.0, and alpha values of < 0.05 for the  
186 factorial Kruskal-Wallis test among classes and pairwise Wilcoxon test between  
187 subclasses were considered as differential signatures discriminating between groups.  
188 A redundancy analysis (RDA) model was used to estimate the amount of variation  
189 among the most abundant mycobiome communities uniquely explained by dietary  
190 patterns after controlling for Tg status (Normal or Hypertriglyceridemia). The  
191 matrices were Hellinger-transformed using the "decostand" function followed by the  
192 "rda" function of the "vegan" package in R [34]. Significance levels determined by  
193 ANOVA and the  $R^2$  values were generated by the "RsquareAdj" function in R [35],  
194 [36]. Correlation of anthropometric/body-composition data, fecal and plasma  
195 metabolome, and gut mycobiome associations were investigated by sparse Partial  
196 Least Squares (sPLS) performed using the R package mixOmics [37]. The Bonferroni  
197 or Benjamini-Hochberg approaches were used to adjust for multiple testing, where  
198 appropriate. For all statistical tests, unless stated otherwise, a *p*-value of  $p < 0.05$  was  
199 considered as statistically significant.



## 200 **Data availability**

201 The raw sequence data of this study were uploaded to EBI's ENA under  
202 accession codes PRJEB34758 and PRJEB34758.

203

## 204 **RESULTS**

### 205 **Clinical Characteristics**

206 In this study, a total of 100 home-dwelling rather sedentary elderly Danes  
207 above the age of 65 years without any known diseases were enrolled in the CALM  
208 study [22]. Blood parameters and anthropometric measurements were determined.  
209 Generally, all the participants had no systemic disease, did not receive any treatment  
210 with drugs that affected glucose and lipid metabolisms, nor did they take antibiotics.  
211 In this study we stratified the participants according to a newly proposed cut-off of  
212 fasting Tg levels; Tg > 1.70 mmol/l among the elderly [21], [38] defining a group of  
213 hypertriglyceridemia (HG, N=25) and normotriglyceridemia (NG, N=75). The HG  
214 group displayed the typical features of this phenotype in comparison with NG group,  
215 such as higher BMI ( $p = 0.003$ ), higher blood pressure; diastolic ( $p = 0.05$ ), higher  
216 lipid profiles; total cholesterol ( $p = 0.001$ ), HDL ( $p = <0.001$ ), and LDL ( $p = 0.02$ ),  
217 and glucose metabolism; fasting OGTT ( $p = 0.009$ ), Hemoglobin A1c ( $p = 0.021$ ),  
218 Proinsulin C-peptide ( $p = <0.001$ ) when compared by Welch t-test (Table 1).  
219 Nevertheless, age and fasting glucose did not present significant differences between  
220 the HG and NG groups.

### 221 **Fungal Diversity and Composition in HG and NG**

222 For the entire cohort, the average number of observed fungal species was 12  
223 (min = 1, max = 86), but with large deviations between individuals (standard  
224 deviation = 14) (Supplementary Figure 1). The gut mycobiome of the investigated

225 older adults consist of a total of 4 phyla, 15 classes, 91 families and 128 different  
226 fungal genera. The elderly gut is home to three main phyla, namely Ascomycota,  
227 Basidiomycota and Zygomycota. The most prevalent genera among the elderly  
228 Danes were *Penicillium*, followed by *Candida*, and *Aspergillus* (Supplementary  
229 Table 1), as previously described in preliminary studies using similar cohort [39]–  
230 [41].

### 231 **Associations with Serum Lipid Profiles for HG Phenotype**

232 In order to determine whether the mycobiome was associated with host  
233 hypertriglyceridemia phenotypes, we utilized clinical metadata collected from CALM  
234 study participants focusing on biomarkers related to serum lipids and glucose  
235 metabolism. Alpha and beta diversity analyses showed clustering of samples  
236 according to Tg and VLDL cholesterol covariates. For both Tg and VLDL covariates,  
237 species richness and phylogenetic diversity (assessed using three different indexes,  
238 namely observed species, PD whole tree, and chao1) were significantly decreased  
239 in HG as compared with NG group samples (Figure 1(i to iii), and Figure 2(i to iii);  
240  $p < 0.05$ ).

241 Based on Tg levels, Bray-Curtis dissimilarity analysis confirmed that gut  
242 mycobiome composition was significantly associated with NG and HG status (Figure  
243 1 (iv),  $p = 0.001$ ,  $R = 0.06$ ). Likewise, a significant association was observed between  
244 mycobiome and VLDL cholesterol status, based on Bray-Curtis dissimilarity analysis  
245 ( $p = 0.002$ ,  $R = 0.06$ ) as shown in Figure 2 (iv).

246 Importantly, analysis of previously published 16S rRNA gene amplicon data  
247 [24], showed that the prokaryote community does not cluster in relation to blood  
248 triglyceride, nor VLDL cholesterol levels (Figure 1 (v) and 2 (v),  $p = > 0.05$ ).

249

## 250 **Genus *Penicillium* associated with the HG**

251 Interestingly, the genus *Penicillium* was prevalent in every individual  
252 classified with HG (Figure 3 (i)). To further investigate the relationship between the  
253 fungal taxa and Tg levels, Pearson's correlation tests were conducted to evaluate top  
254 most abundant taxa. Genus *Penicillium* showed strong correlation with increased levels  
255 of Tg ( $R=0.311$ ,  $p = 0.006$ ) while other abundant genera, namely *Candida*, *Aspergillus*,  
256 and Unclassified Saccharomycetales did not show any significant correlation with Tg  
257 levels (Figure 3 (ii)).

258 The most relevant taxa responsible for the differences between NG and HG  
259 were identified by LEfSe analysis. Healthy individuals had a significantly higher  
260 relative abundance of autochthonous mycobiome taxa, when compared with  
261 hypertriglyceridemia elderly from HG. The genus *Aspergillus*, as well as members of  
262 family Saccharomycetales, Saccharomycodaceae, Mucoraceae, Saccharomycetaceae  
263 and order Capnodiales were significantly more abundant in NG individuals, whereas  
264 genus *Penicillium* and the order Eurotiales were strongly associated with HG as  
265 shown in Figure 3 (iii).

## 266 **Effect of Diet on the Mycobiome among NG and HG**

267 Notably, RDA analysis showed significant clustering of NG and HG groups  
268 and dietary patterns, which again was reflected in the gut mycobiome. Among the HG  
269 population, the dietary elements related to saturated fatty acids ( $p = 0.004$ ) and fats  
270 ( $p < 0.05$ ) were associated with higher relative abundance of *Penicillium* and  
271 *Rhodotorula* species (Figure 4). Dietary elements related to vegetable oils, fibres, and  
272 legumes were shown to be modestly associated with lower Tg levels, no significant  
273 associations appeared with mycobiome profiles like *Aspergillus*, *Candida*, *Mucor*,

274 unclassified Saccharomycetales, unclassified Capnodiales and others (ANOVA with  
275 Bonferroni correction,  $p > 0.05$ ).

## 276 **SCFAs and Untargeted Serum and Fecal Metabolites Correlate with Gut**

### 277 **Mycobiome of the Elderly**

278 sPLS analyses were performed to determine possible correlations between the  
279 dominant fungal genera and untargeted plasma and fecal metabolites. *Aspergillus* and  
280 *Guehomyces* were positively correlated with levels of the stool metabolites butyrate,  
281 butanoic acid, and valeric acid. *Cyberlindnera* and an unclassified *Pleosporales*  
282 member were positively correlated with plasma metabolites such as ribitol and 1-  
283 piperidineacetonitrile (Figure 5).

284

## 285 **DISCUSSION**

286 Previous studies have characterized human gut fungal communities from  
287 diverse age groups [13], [15], [42], but information describing the gut mycobiome of  
288 older adults is sparse. Several studies suggest that prokaryote communities are  
289 hallmarks for atherosclerosis pathogenesis [43]–[46]. Here, we present data showing  
290 an association between gut mycobiome dysbiosis and hypertriglyceridemia in a  
291 homogeneous and well-characterized healthy cohort of older Danish adults.

292 Collectively, we found that the richness of the gut mycobiome among the  
293 studied population was low within individuals. Likewise, a previous study also  
294 showed lower alpha diversity of eukaryote community as compared to the gut  
295 bacterial community [15], which is furthermore decreasing throughout the course of  
296 life due to ageing [42]. In the present study, *Penicillium* was predominant in many of  
297 the subjects. In contrast, previous studies have indicated that *Candida*,

298 *Saccharomyces* and *Cladosporium* are common gut commensal fungi, where the  
299 *Candida* genus predominantly forms the core mycobiome in the gut [15], [47], [48].

300 The causes of hypertriglyceridemia can be a result of interactions between  
301 genetic precursors [49], non-genetic factors such as unhealthy diet and lifestyle [50],  
302 diseases related to metabolic syndromes [51], and usage of some types of medicine  
303 [52]. A total of 25 of the included participants had Tg levels above the recommended  
304 level of 1.7 mmol/L [53]–[56]. We observed that the participants with high Tg levels  
305 were strongly associated with low in gut mycobiome community richness and  
306 diversity. Similarly, a similar pattern of good versus unhealthy VLDL cholesterol  
307 levels strongly linked to the mycobiome composition was observed. Hence, the  
308 increased trends in circulating cholesterol of Tg and VLDL in relation to specific gut  
309 mycobiome clusters could be used as potential indicators for describing the  
310 hypertriglyceridemia phenotype.

311 LEfSe analysis showed that an upsurge in *Penicillium* genus could be  
312 associated with hypertriglyceridemia. However, the utility of *Penicillium* as a  
313 biomarker in predicting the progression of atherosclerosis among older adults is  
314 unclear, and therefore, this association warrants further investigation. Another  
315 interesting observation was the positive association between the relative abundance of  
316 the genus *Mucor* and the subjects with normal Tg levels. This is in line with previous  
317 studies showing that *Mucor* is abundant in the gut of non-obese subjects [13], and  
318 confer protection from the risk of CVD [14]. In the present study, subjects stratified  
319 into NG and HG groups also differed in BMI levels (NG = 25.4±3.5; TG = 26.9±3.4  
320 kg·m<sup>-2</sup>;  $p = 0.003$ ), but no clustering between the gut mycobiome and BMI was  
321 observed.

322           Interestingly, strong correlations between dietary data and gut mycobiome  
323 members and hypertriglyceridemia indicate a role of factors in the disease.  
324 Particularly, in the case of *Penicillium*, positive correlations with a diet rich in  
325 saturated fatty acids and other lipids are common indicators for higher Tg and VLDL  
326 cholesterol in circulating serum of hosts, which have been reported to be associated  
327 with signatures in coronary atherosclerotic plaques [57], aneurysms of the carotid  
328 artery [58], and negatively correlated with HDL-cholesterol [13]. Hence, we speculate  
329 that these dietary intakes such as fermented dairy products such as cheese[59] might  
330 contribute to increased Tg and VLDL cholesterol levels among the older adult  
331 subjects enrolled in this study.

332           Finally, we investigated the relationship of the stool and plasma metabolomes  
333 and the gut mycobiome by performing regression-based modelling on 329 metabolites  
334 and 107 OTUs that were assigned to at least the genus level. We observed that  
335 *Aspergillus* together with *Guehomyces* was positively associated with faecal SCFA  
336 and specifically valeric, butyric and butanoic acids. Inversely, ribitol – the sugar  
337 alcohol from fruit fermentation by reduction of ribose [60], was positively correlated  
338 with *Cyberlindnera* and unclassified *Pleosporales*. Previously, *Aspergillus* was found  
339 to negatively correlate with SCFAs in subjects on a carbohydrate-rich diet [61].  
340 However, a recent study showed that *Aspergillus* species are capable of producing  
341 SCFAs metabolites from fibre rich diet substances [62]. No significant correlations  
342 between *Penicillium* abundance and any of the metabolites were identified.

343           Most fungal species detected in gut mycobiome studies are considered  
344 transient components of the community, and putatively of environmental origin,  
345 where the composition in particular is influenced by food-borne fungi and life-style  
346 [63], [64], together with other factors such as age, gender and geographical setting

347 [7], [42], [65]. However, due to the dearth of information related to gut mycobiome  
348 studies, little is known about its relationship with fecal metabolome and other factors  
349 such as environmental effects, diet and life style [66] that may lead to  
350 hypertriglyceridemia.

351

## 352 **CONCLUSION**

353 To the best of our knowledge, this is the first study to demonstrate that  
354 hypertriglyceridemia among elderly is associated with gut mycobiome dysbiosis  
355 characterized by overall reduction of the microbial richness and diversity as well as  
356 dysbiosis pattern of the gut mycobiome structure compared to those senior citizens  
357 with normal levels of circulating plasma triglycerides. These findings also highlight  
358 that the everyday diet shapes the gut mycobiome and host metabolome components  
359 among the older citizens. However, it remains unknown whether the microbial  
360 markers and patterns identified here are also adaptable to changes in life styles and  
361 applicable to other cultures in the world.

362

## 363 **ACKNOWLEDGEMENTS**

364 This project was supported by the University of Copenhagen-funded project  
365 “Counteracting Age-related Loss of Skeletal Muscle (CALM)”, the Danish Dairy  
366 Research Foundation, Arla Foods Ingredients P/S, stipends from Universiti Malaysia  
367 Pahang, Malaysia, and Ministry of Education, Malaysia.

368

## 369 **AUTHORS CONTRIBUTION**

370 HFA performed laboratory procedures; DSN, LH, SBE, SR, JLC, HFA designed the  
371 study; RLB, SR, GWH, LH collected and provided samples as well as analyzed

372 clinical data; BK carried out metabolome analysis; WK carried out sequencing of  
373 libraries, HFA, JLC, LK, KF, DSN coupled and analyzed the different datasets of the  
374 study; HFA and DSN drafted the manuscript. All authors commented on, added  
375 paragraphs and approved the last version of this manuscript.

376

### 377 **DISCLOSURE OF POTENTIAL CONFLICTS OF INTEREST**

378 This manuscript has not been published elsewhere and has not been submitted  
379 simultaneously for publication elsewhere. The authors declare no conflict of interest.

380

### 381 **SUPPLEMENTARY INFORMATION**

382 **Supplementary Figure 1** : Alpha diversity. All the matrices showed that every  
383 individual contains low alpha diversity of fungal community at rarefaction of 1427  
384 reads per sequence.

385

386 **Supplementary Table 1** : Taxonomic composition of all fungi sequences identified  
387 at genera level among the healthy elderly Danes (%).

388

### 389 **REFERENCES**

- 390 [1] P. Alonso-Fernández and M. Fuente, "Role of the immune system in aging  
391 and longevity," *Curr Aging Sci*, vol. 4, 2011.
- 392 [2] S. Rampelli *et al.*, "Functional metagenomic profiling of intestinal  
393 microbiome in extreme ageing," vol. 5, no. 12, pp. 902–912, 2013.
- 394 [3] M. J. Claesson *et al.*, "Gut microbiota composition correlates with diet and  
395 health in the elderly.," *Nature*, vol. 488, no. 7410, pp. 178–84, Aug. 2012.
- 396 [4] S. Saraswati and R. Sitaraman, "Aging and the human gut microbiota—



- 397 from correlation to causality ,” *Frontiers in Microbiology* , vol. 5. p. 764,  
398 2015.
- 399 [5] N. Thevaranjan *et al.*, “Age-Associated Microbial Dysbiosis Promotes  
400 Intestinal Permeability, Systemic Inflammation, and Macrophage  
401 Dysfunction,” *Cell Host Microbe*, vol. 21, no. 4, pp. 455-466.e4, Apr. 2017.
- 402 [6] S. Z. N. Effa, S. J. Phang, and H. F. Ahmad, “Autoimmune Diseases and Gut  
403 Symbionts : The Unpopular Liaison,” *Malaysian J. Med. Heal. Sci.*, vol. 15, no.  
404 13, pp. 165–172, 2019.
- 405 [7] E. Biagi *et al.*, “Gut Microbiota and Extreme Longevity,” *Curr. Biol.*, vol. 26,  
406 no. 11, pp. 1480–1485, Aug. 2016.
- 407 [8] M. A. Jackson *et al.*, “Signatures of early frailty in the gut microbiota,”  
408 *Genome Med.*, vol. 8, no. 1, pp. 1–11, 2016.
- 409 [9] P. W. O’Toole and I. B. Jeffery, “Gut microbiota and aging,” *Science (80-. )*,  
410 vol. 350, no. 6265, pp. 1214–1215, Dec. 2015.
- 411 [10] S.-H. Park, K.-A. Kim, Y.-T. Ahn, J.-J. Jeong, C.-S. Huh, and D.-H. Kim,  
412 “Comparative analysis of gut microbiota in elderly people of urbanized  
413 towns and longevity villages,” *BMC Microbiol.*, vol. 15, no. 1, pp. 1–9, 2015.
- 414 [11] C. A. Kumamoto, “The Fungal Mycobiota: Small Numbers, Large Impacts,”  
415 *Cell Host Microbe*, vol. 19, no. 6, pp. 750–751, Jun. 2016.
- 416 [12] H. Sokol *et al.*, “Fungal microbiota dysbiosis in IBD,” *Gut* , Feb. 2016.
- 417 [13] M. Mar Rodríguez *et al.*, “Obesity changes the human gut mycobiome,” *Sci.*  
418 *Rep.*, vol. 5, p. 14600, 2015.
- 419 [14] M. R. Chacón *et al.*, “The gut mycobiome composition is linked to carotid  
420 atherosclerosis,” *Benef. Microbes*, vol. 9, no. 2, pp. 185–198, Nov. 2017.
- 421 [15] A. K. Nash *et al.*, “The gut mycobiome of the Human Microbiome Project

- 422 healthy cohort,” *Microbiome*, vol. 5, no. 1, p. 153, Nov. 2017.
- 423 [16] C. Andersson and R. S. Vasan, “Epidemiology of cardiovascular disease in  
424 young individuals,” *Nat. Rev. Cardiol.*, vol. 15, p. 230, Oct. 2017.
- 425 [17] J. Peng, F. Luo, G. Ruan, R. Peng, and X. Li, “Hypertriglyceridemia and  
426 atherosclerosis,” *Lipids Health Dis.*, vol. 16, p. 233, Dec. 2017.
- 427 [18] N. Sarwar *et al.*, “Triglycerides and the Risk of Coronary Heart Disease,”  
428 *Circulation*, vol. 115, no. 4, pp. 450 LP – 458, Jan. 2007.
- 429 [19] N. BG, M. Benn, P. Schnohr, and A. Tybjaerg-Hansen, “Nonfasting  
430 triglycerides and risk of myocardial infarction, ischemic heart disease, and  
431 death in men and women,” *JAMA*, vol. 298, no. 3, pp. 299–308, Jul. 2007.
- 432 [20] Z. Liu *et al.*, “Associations of triglyceride levels with longevity and frailty: A  
433 Mendelian randomization analysis,” *Sci. Rep.*, vol. 7, p. 41579, Jan. 2017.
- 434 [21] Ž. Reiner, “Hypertriglyceridaemia and risk of coronary artery disease,”  
435 *Nat. Rev. Cardiol.*, vol. 14, p. 401, Mar. 2017.
- 436 [22] R. Bechshøft *et al.*, “Counteracting Age-related Loss of Skeletal Muscle  
437 Mass: a clinical and ethnological trial on the role of protein  
438 supplementation and training load (CALM Intervention Study): study  
439 protocol for a randomized controlled trial,” *Trials*, vol. 17, no. 1, pp. 1–17,  
440 2016.
- 441 [23] J. White, T.J., Bruns, T., Lee, S., & Taylor, “Amplification and direct  
442 sequencing of fungal ribosomal RNA genes for phylogenetics,” in *PCR*  
443 *Protocols: A guide to Methods and Applications.*, New York, USA: Academic  
444 Press, Inc, 1990, pp. 315–322.
- 445 [24] J. L. Castro-Mejía *et al.*, “Physical fitness in community-dwelling older  
446 adults is linked to dietary intake, gut microbiota, and metabolomic

- 447 signatures," *Aging Cell*, vol. n/a, no. n/a, p. e13105, Jan. 2020.
- 448 [25] R. C. Edgar, "Search and clustering orders of magnitude faster than  
449 BLAST," *Bioinformatics*, vol. 26, 2010.
- 450 [26] R. C. Edgar, "UPARSE: Highly accurate OTU sequences from microbial  
451 amplicon reads," *Nat. Methods*, vol. 10, no. 10, pp. 996–998, Oct. 2013.
- 452 [27] K. Urmas *et al.*, "Towards a unified paradigm for sequence-based  
453 identification of fungi," *Mol. Ecol.*, vol. 22, no. 21, pp. 5271–5277, Aug.  
454 2013.
- 455 [28] S. F. Altschul, W. Gish, W. Miller, E. W. Myers, and D. J. Lipman, "Basic local  
456 alignment search tool," *J. Mol. Biol.*, vol. 215, no. 3, pp. 403–410, 1990.
- 457 [29] D. S. Hibbett, "A phylogenetic overview of the Agaricomycotina,"  
458 *Mycologia*, vol. 98, no. 6, pp. 917–925, Nov. 2006.
- 459 [30] J. G. Caporaso *et al.*, "QIIME allows analysis of high-throughput community  
460 sequencing data," *Nat. Methods*, vol. 7, no. 5, pp. 335–336, 2010.
- 461 [31] A. R. Williams *et al.*, "Dietary cinnamaldehyde enhances acquisition of  
462 specific antibodies following helminth infection in pigs," *Vet. Immunol.*  
463 *Immunopathol.*, vol. 189, 2017.
- 464 [32] M. J. Anderson, "A new method for non-parametric multivariate analysis of  
465 variance," *Austral Ecol.*, vol. 26, no. 1, pp. 32–46, Feb. 2001.
- 466 [33] N. Segata *et al.*, "Metagenomic biomarker discovery and explanation,"  
467 *Genome Biol.*, vol. 12, no. 6, pp. R60–R60, Jun. 2011.
- 468 [34] P. Legendre and E. D. Gallagher, "Ecologically meaningful transformations  
469 for ordination of species data," *Oecologia*, vol. 129, no. 2, pp. 271–280,  
470 2001.
- 471 [35] C.-Y. Lay *et al.*, "Canola Root-Associated Microbiomes in the Canadian

- 472 Prairies ,” *Frontiers in Microbiology* , vol. 9. p. 1188, 2018.
- 473 [36] G. Dubois, C. Girard, F.-J. Lapointe, and B. J. Shapiro, “The Inuit gut  
474 microbiome is dynamic over time and shaped by traditional foods,”  
475 *Microbiome*, vol. 5, no. 1, p. 151, Nov. 2017.
- 476 [37] F. Rohart, B. Gautier, A. Singh, and K.-A. Lê Cao, “mixOmics: An R package  
477 for ‘omics feature selection and multiple data integration,” *PLOS Comput.  
478 Biol.*, vol. 13, no. 11, p. e1005752, Nov. 2017.
- 479 [38] A. F. Members: *et al.*, “European Guidelines on cardiovascular disease  
480 prevention in clinical practice (version 2012)’ The Fifth Joint Task Force of  
481 the European Society of Cardiology and Other Societies on Cardiovascular  
482 Disease Prevention in Clinical Practice (constituted by r,” *Eur. Heart J.*, vol.  
483 33, no. 17, p. 2126, Sep. 2012.
- 484 [39] H. F. Bin Ahmad *et al.*, “The gut mycobiome of elderly danes,” in  
485 *Proceedings of the Danish Microbiological Society Annual Congress 2016*,  
486 2016.
- 487 [40] H. F. Bin Ahmad *et al.*, “Deciphering the association networks of  
488 mycobiome communities among the elderly Danes,” in *Cell Symposium:  
489 Exercise Metabolism*, 2017.
- 490 [41] R. Vemuri, M. E. Shankar, M. Chieppa, R. Eri, and K. Kavanagh, “Beyond Just  
491 Bacteria: Functional Biomes in the Gut Ecosystem Including Virome,  
492 Mycobiome, Archaeome and Helminths,” *Microorganisms* , vol. 8, no. 4.  
493 2020.
- 494 [42] F. Strati *et al.*, “Age and Gender Affect the Composition of Fungal  
495 Population of the Human Gastrointestinal Tract,” *Front. Microbiol.*, vol. 7, p.  
496 1227, 2016.

- 497 [43] J. M. Brown and S. L. Hazen, "The Gut Microbial Endocrine Organ:  
498 Bacterially-Derived Signals Driving Cardiometabolic Diseases," *Annu. Rev.*  
499 *Med.*, vol. 66, pp. 343–359, 2015.
- 500 [44] B. B. Lanter, K. Sauer, and D. G. Davies, "Bacteria Present in Carotid Arterial  
501 Plaques Are Found as Biofilm Deposits Which May Contribute to Enhanced  
502 Risk of Plaque Rupture," *mBio*, vol. 5, no. 3, Jul. 2014.
- 503 [45] D. A. Chistiakov, Y. V Bobryshev, E. Kozarov, I. A. Sobenin, and A. N.  
504 Orekhov, "Role of gut microbiota in the modulation of atherosclerosis-  
505 associated immune response," *Front. Microbiol.*, vol. 6, p. 671, Jun. 2015.
- 506 [46] D. Y. Li and W. H. W. Tang, "Gut Microbiota and Atherosclerosis," *Curr.*  
507 *Atheroscler. Rep.*, vol. 19, no. 10, p. 39, 2017.
- 508 [47] P. D. Scanlan and J. R. Marchesi, "Micro-eukaryotic diversity of the human  
509 distal gut microbiota: qualitative assessment using culture-dependent and  
510 -independent analysis of faeces," *ISME J*, vol. 2, no. 12, pp. 1183–1193, Jul.  
511 2008.
- 512 [48] D. M. Underhill and I. D. Iliev, "The mycobiota: interactions between  
513 commensal fungi and the host immune system," *Nat Rev Immunol*, vol. 14,  
514 no. 6, pp. 405–416, Jun. 2014.
- 515 [49] G. F. Watts, E. M. M. Ooi, and D. C. Chan, "Demystifying the management of  
516 hypertriglyceridaemia," *Nat. Rev. Cardiol.*, vol. 10, p. 648, Sep. 2013.
- 517 [50] P. M. Hunter and R. A. Hegele, "Functional foods and dietary supplements  
518 for the management of dyslipidaemia," *Nat. Rev. Endocrinol.*, vol. 13, p. 278,  
519 Jan. 2017.
- 520 [51] S. M. Grundy, "Hypertriglyceridemia, insulin resistance, and the metabolic  
521 syndrome," *Am. J. Cardiol.*, vol. 83, no. 9, Supplement 2, pp. 25–29, 1999.

- 522 [52] H. K. Singh, M. S. Prasad, A. K. Kandasamy, and K. Dharanipragada,  
523 “Tamoxifen-induced hypertriglyceridemia causing acute pancreatitis,” *J.*  
524 *Pharmacol. Pharmacother.*, vol. 7, no. 1, pp. 38–40, Feb. 2016.
- 525 [53] A. C. Scott *et al.*, “Chemical Mediators of the Muscle Ergoreflex in Chronic  
526 Heart Failure,” *Circulation*, vol. 106, no. 2, pp. 214 LP – 220, Jul. 2002.
- 527 [54] L. Berglund *et al.*, “Evaluation and Treatment of Hypertriglyceridemia: An  
528 Endocrine Society Clinical Practice Guideline,” *J. Clin. Endocrinol. Metab.*,  
529 vol. 97, no. 9, pp. 2969–2989, Sep. 2012.
- 530 [55] T. J. Anderson *et al.*, “2012 Update of the Canadian Cardiovascular Society  
531 Guidelines for the Diagnosis and Treatment of Dyslipidemia for the  
532 Prevention of Cardiovascular Disease in the Adult,” *Can. J. Cardiol.*, vol. 29,  
533 no. 2, pp. 151–167, Feb. 2013.
- 534 [56] T. Teramoto *et al.*, “Executive Summary of the Japan Atherosclerosis  
535 Society (JAS) Guidelines for the Diagnosis and Prevention of  
536 Atherosclerotic Cardiovascular Diseases in Japan &mdash;2012 Version,” *J.*  
537 *Atheroscler. Thromb.*, vol. 20, no. 6, pp. 517–523, 2013.
- 538 [57] S. J. Ott *et al.*, “Fungi and inflammatory bowel diseases: alterations of  
539 composition and diversity,” *Scand J Gastroenterol*, vol. 43, 2008.
- 540 [58] A. Hot *et al.*, “Fungal Internal Carotid Artery Aneurysms: Successful  
541 Embolization of an Aspergillus-Associated Case and Review,” *Clin. Infect.*  
542 *Dis.*, vol. 45, no. 12, pp. e156–e161, Dec. 2007.
- 543 [59] G. Gillot *et al.*, “Insights into *Penicillium roqueforti* Morphological and  
544 Genetic Diversity,” *PLoS One*, vol. 10, no. 6, p. e0129849, Jun. 2015.
- 545 [60] R. L. P. Jump *et al.*, “Metabolomics analysis identifies intestinal microbiota-  
546 derived biomarkers of colonization resistance in clindamycin-treated

- 547 mice," *PLoS One*, vol. 9, no. 7, pp. e101267–e101267, Jul. 2014.
- 548 [61] C. Hoffmann *et al.*, "Archaea and Fungi of the Human Gut Microbiome:  
549 Correlations with Diet and Bacterial Residents," *PLoS One*, vol. 8, no. 6, p.  
550 e66019, Jun. 2013.
- 551 [62] E. Baltierra-Trejo, J. M. Sánchez-Yáñez, O. Buenrostro-Delgado, and L.  
552 Márquez-Benavides, "Production of short-chain fatty acids from the  
553 biodegradation of wheat straw lignin by *Aspergillus fumigatus*," *Bioresour.*  
554 *Technol.*, vol. 196, pp. 418–425, 2015.
- 555 [63] A. M. Madsen *et al.*, "Generation and Characterization of Indoor Fungal  
556 Aerosols for Inhalation Studies," *Appl. Environ. Microbiol.*, vol. 82, no. 8, pp.  
557 2479–2493, Apr. 2016.
- 558 [64] H. E. Hallen-Adams and M. J. Suhr, "Fungi in the healthy human  
559 gastrointestinal tract," *Virulence*, vol. 8, no. 3, pp. 352–358, Apr. 2017.
- 560 [65] T. Yatsuneneko, F. E. Rey, M. J. Manary, I. Trehan, M. G. Dominguez-Bello,  
561 and M. Contreras, "Human gut microbiome viewed across age and  
562 geography," *Nature*, vol. 486, 2012.
- 563 [66] T. Jensen *et al.*, "Whey protein stories – An experiment in writing a  
564 multidisciplinary biography," *Appetite*, vol. 107, 2016.

565

566

567

568

569

570

571

572 **Figure 1:** Gut mycobiome composition in association with Tg; Hypertriglyceridemia

573 (HG) is defined when Tg > 1.77 mmol/l. Normotriglyceridemia (NG) when Tg <

574 1.77 mmol/l.

575 i), ii) and iii) Alpha diversity measures. Differences in alpha diversity in gut

576 mycobiome between two groups according to triglycerides levels are shown by the

577 indices Observed species, PD whole tree and Chao1 \* $p < 0.05$ .

578 iv) Gut Mycobiome composition is linked to Tg-levels. Principal Coordinates

579 Analysis (PCoA) plot based on Bray–Curtis dissimilarity matrix. Adonis analysis

580 showed significant separation between the groups (Bray-Curtis,  $R = 0.06$ , adonis;  $p =$

581 0.001).

582 v) Gut prokaryotic composition is not associated with Tg-levels. PCoA plot based on

583 Bray–Curtis dissimilarity matrix. Adonis-analysis showed no significant separation

584 between the groups.

585

586

587

588

589

590

591

592

593

594

595

596



597 **Figure 2:** Gut mycobiome composition in association with VLDL.  
598 Hypertriglyceridaemia (HG) is defined when VLDL > 0.77 mmol/l.  
599 i), ii) and iii) Alpha diversity measures. Differences in alpha diversity in gut  
600 mycobiome between two groups according to VLDL levels are shown by the indices  
601 Observed species, PD whole tree and Chao1 \* $p < 0.05$ .  
602 iv) Gut mycobiome composition is linked to VLDL-levels. Principal Coordinates  
603 Analysis (PCoA) plot based on Bray–Curtis dissimilarity matrix. Adonis analysis  
604 showed significant separation between the groups (Bray-Curtis,  $R = 0.06$ , adonis;  $p =$   
605  $0.002$ ).  
606 v) Gut prokaryotic composition is not associated with VLDL-levels. PCoA plot based  
607 on Bray–Curtis dissimilarity matrix. Adonis-analysis showed no significant separation  
608 between the groups.  
609  
610  
611  
612  
613  
614  
615  
616  
617  
618  
619  
620  
621

622 **Figure 3:** Dysbiosis patterns of the gut mycobiome.

623 i) Gut mycobiome composition (relative abundance) of elderly Danes based as

624 determined by ITS2 high throughput amplicon sequencing.

625 ii) Correlation between the top most abundant taxa with Tg levels. The Spearman

626 Rank probability (P) and correlation (R) are shown in the graphs.

627 iii) LEfSe was conducted to explore potential mycobiome differences between NG

628 and HG groups. LDA Score was constructed, and the bar represents a log<sub>10</sub>

629 transformed LDA score. The red color represents taxa that corresponding to HG, and

630 the green color represents NG. All taxa presented are significant,  $p < 0.05$  confirmed

631 by alpha value for the factorial Kruskal-Wallis test among classes, and the

632 discriminative threshold was set  $> 2.0$ .

633

634

635

636

637

638

639

640

641

642

643

644

645

646

647 **Figure 4:** RDA biplot at OTU level with Hellinger-transformed data. Red dots  
648 represent individuals with high Tg levels (Hypertriglyceridemia, HG) and green dots,  
649 individuals with normal Tg levels. Cut-off for plotted factors was ANOVA with  
650 Bonferroni correction,  $p < 0.05$ .

651

652

653

654

655

656

657

658

659

660

661

662

663

664

665

666

667

668

669

670

671

672 **Figure 5:** Sparse partial least squared correlations (sPLS) for mycobiome and  
673 untargeted fecal metabolomes. sPLS in regression mode (predict Y from X) to model  
674 a causal relationship between the most relevant of fungal genera and metabolites from  
675 serum and stool. Heatmap displaying the relative accumulation patterns using color-  
676 coding (green for negative correlation, and red for positive correlation) of 14  
677 untargeted metabolites against 16 fungal communities.

678

679

680

681

682

683

684

685

686

687

688

689

690

691

692 **TABLE**

693 **Table 1.** Clinical and anthropometrical features of the study groups. Data are given as  
694 mean  $\pm$  standard deviation (SD). The Welch's t-test outcomes are presented and  
695 significant *P*-values indicated by \* are included,  $p < 0.05$ .

696

697

698

699

700

701

**Table 1.** Clinical and anthropometrical features of the study groups. Data are given as mean  $\pm$  standard deviation (SD). The Welch's t-test outcomes are presented and significant *P*-values indicated by \* are included, *p* < 0.05.

| Features                       | Normotriglyceridemia Group (NG)<br>Tg <1.70 mmol/l | Hypertriglyceridemia Group HG<br>Tg >1.70 mmol/l | <i>P</i> -value |
|--------------------------------|----------------------------------------------------|--------------------------------------------------|-----------------|
| <b>Total participants, N</b>   | 70                                                 | 30                                               |                 |
| Age (years)                    | 69.27 $\pm$ 3.48                                   | 70.27 $\pm$ 3.94                                 | 0.106           |
| BMI (kg/cm <sup>2</sup> )      | 24.81 $\pm$ 3.29                                   | 26.87 $\pm$ 3.43                                 | *0.003          |
| <b>Blood pressure</b>          |                                                    |                                                  |                 |
| Systolic (mmHg)                | 142.86 $\pm$ 21.57                                 | 144.57 $\pm$ 15.54                               | 0.347           |
| Diastolic (mmHg)               | 83.79 $\pm$ 10.03                                  | 87.67 $\pm$ 11.97                                | *0.050          |
| <b>Lipid profile</b>           |                                                    |                                                  |                 |
| Total cholesterol (mmol/l)     | 5.54 $\pm$ 0.89                                    | 6.14 $\pm$ 0.91                                  | *0.001          |
| HDL-cholesterol (mmol/l)       | 1.92 $\pm$ 0.46                                    | 1.50 $\pm$ 0.43                                  | *<0.001         |
| LDL-cholesterol (mmol/l)       | 3.12 $\pm$ 0.86                                    | 3.53 $\pm$ 0.96                                  | *0.020          |
| VLDL-cholesterol (mmol/l)      | 0.51 $\pm$ 0.14                                    | 1.04 $\pm$ 0.24                                  | *<0.001         |
| Fasting triglycerides (mmol/l) | 1.11 $\pm$ 0.30                                    | 2.43 $\pm$ 0.72                                  | 0.08            |
| <b>Glucose metabolism</b>      |                                                    |                                                  |                 |
| Fasting glucose (mmol/l)       | 5.37 $\pm$ 0.43                                    | 5.51 $\pm$ 0.59                                  | 0.115           |
| OGTT 120 glucose (mmol/l)      | 6.50 $\pm$ 1.60                                    | 7.35 $\pm$ 1.57                                  | *0.009          |
| Haemoglobin A1c (mmol/mol)     | 35.19 $\pm$ 3.21                                   | 36.57 $\pm$ 2.81                                 | *0.021          |
| Proinsulin C-peptide (pmol/l)  | 623.27 $\pm$ 213.56                                | 916.46 $\pm$ 314.86                              | *<0.001         |

bioRxiv preprint doi: <https://doi.org/10.1101/2020.04.16.044693>; this version posted April 17, 2020. The copyright holder for this preprint (which was not certified by peer review) is the author/funder, who has granted bioRxiv a license to display the preprint in perpetuity. It is made available under aCC-BY 4.0 International license.

Abbreviations: BMI, body mass index; HDL, high-density lipoprotein; LDL, low-density lipoprotein; VLDL, very low-density lipoprotein; OGTT 120, oral glucose tolerant test at 120 minutes; Haemoglobin A1c, glycated haemoglobin,

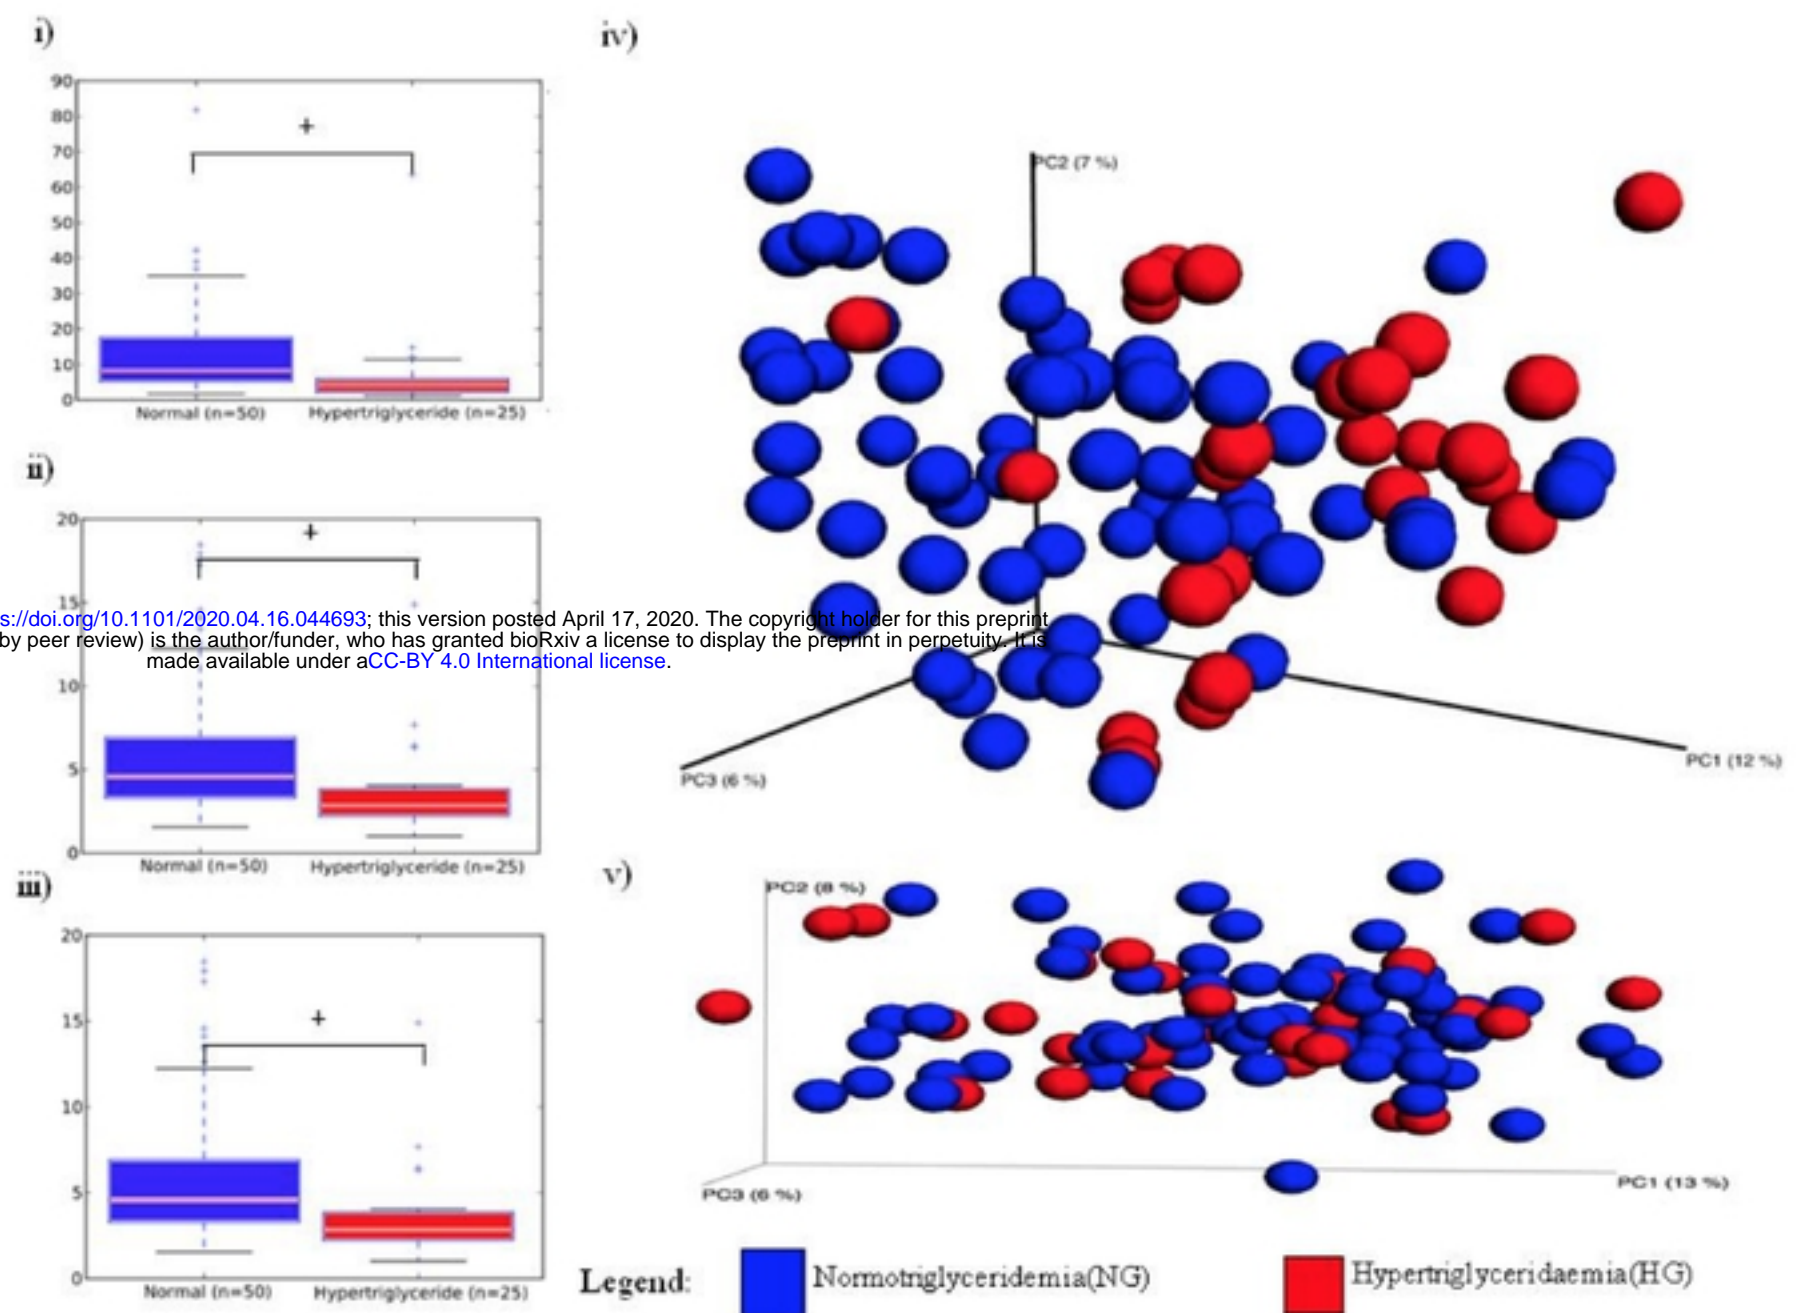

**Figure 1: Gut mycobiome composition in association with Tg; Hypertriglyceridemia (HG) is defined when Tg > 1.77 mmol/l. Normotriglyceridemia (NG) when Tg < 1.77 mmol/l. i), ii) and iii) Alpha diversity measures. Differences in alpha diversity in gut mycobiome between two groups according to triglycerides levels are shown by the indices Observed species, PD whole tree and Chao1  $+p < 0.05$ . iv) Gut Mycobiome composition is linked to Tg-levels. Principal Coordinates Analysis (PCoA) plot based on Bray–Curtis dissimilarity matrix. Adonis analysis showed significant separation between the groups (Bray-Curtis,  $R = 0.06$ , adonis;  $p = 0.001$ ). v) Gut prokaryotic composition is not associated with Tg-levels. PCoA plot based on Bray–Curtis dissimilarity matrix. Adonis-analysis showed no significant separation between the groups.**



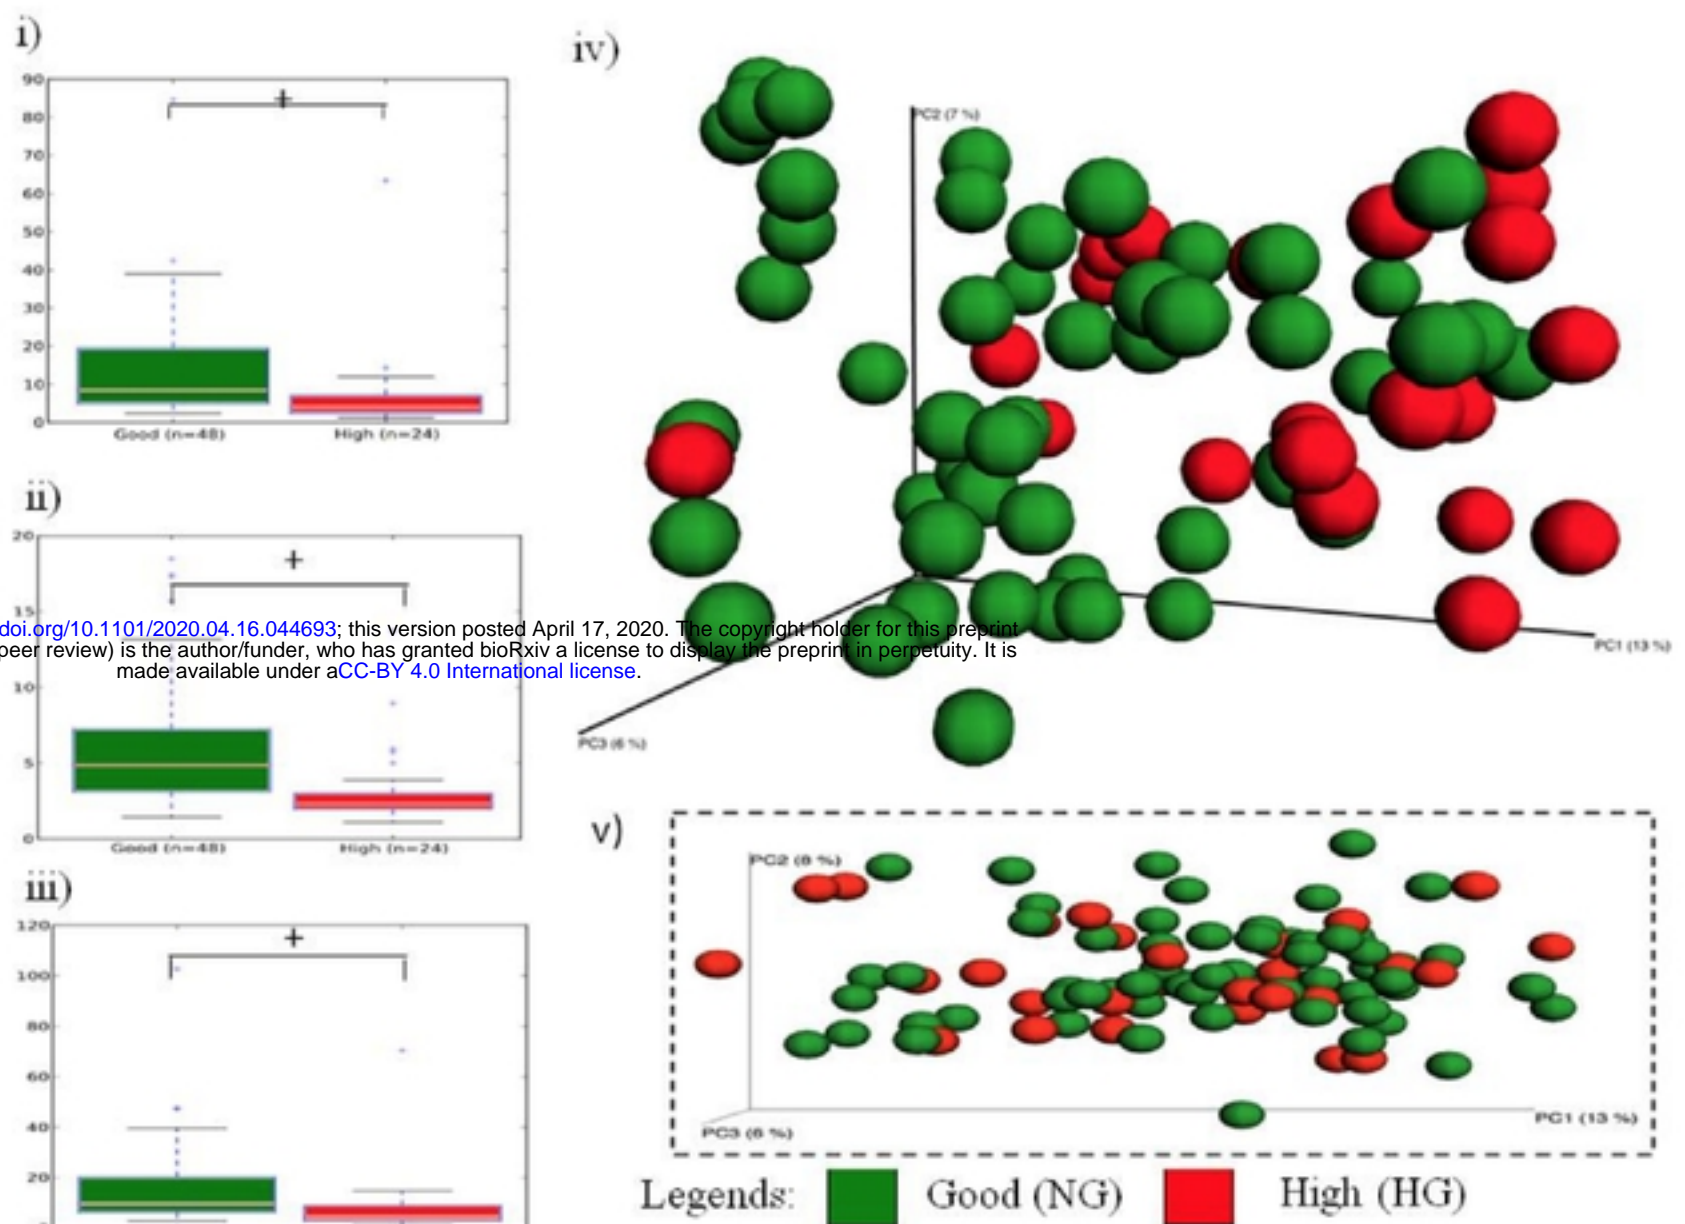

**Figure 2:** Gut microbiome composition in association with VLDL.

Hypertriglyceridaemia (HG) is defined when VLDL > 0.77 mmol/l. i), ii) and iii)

Alpha diversity measures. Differences in alpha diversity in gut microbiome between

two groups according to VLDL levels are shown by the indices Observed species, PD

whole tree and Chao1  $+p < 0.05$ . iv) Gut microbiome composition is linked to VLDL-

levels. Principal Coordinates Analysis (PCoA) plot based on Bray–Curtis

dissimilarity matrix. Adonis analysis showed significant separation between the

groups (Bray-Curtis,  $R = 0.06$ , adonis;  $p = 0.002$ ). v) Gut prokaryotic composition is

not associated with VLDL-levels. PCoA plot based on Bray–Curtis dissimilarity

matrix. Adonis-analysis showed no significant separation between the groups.



i)

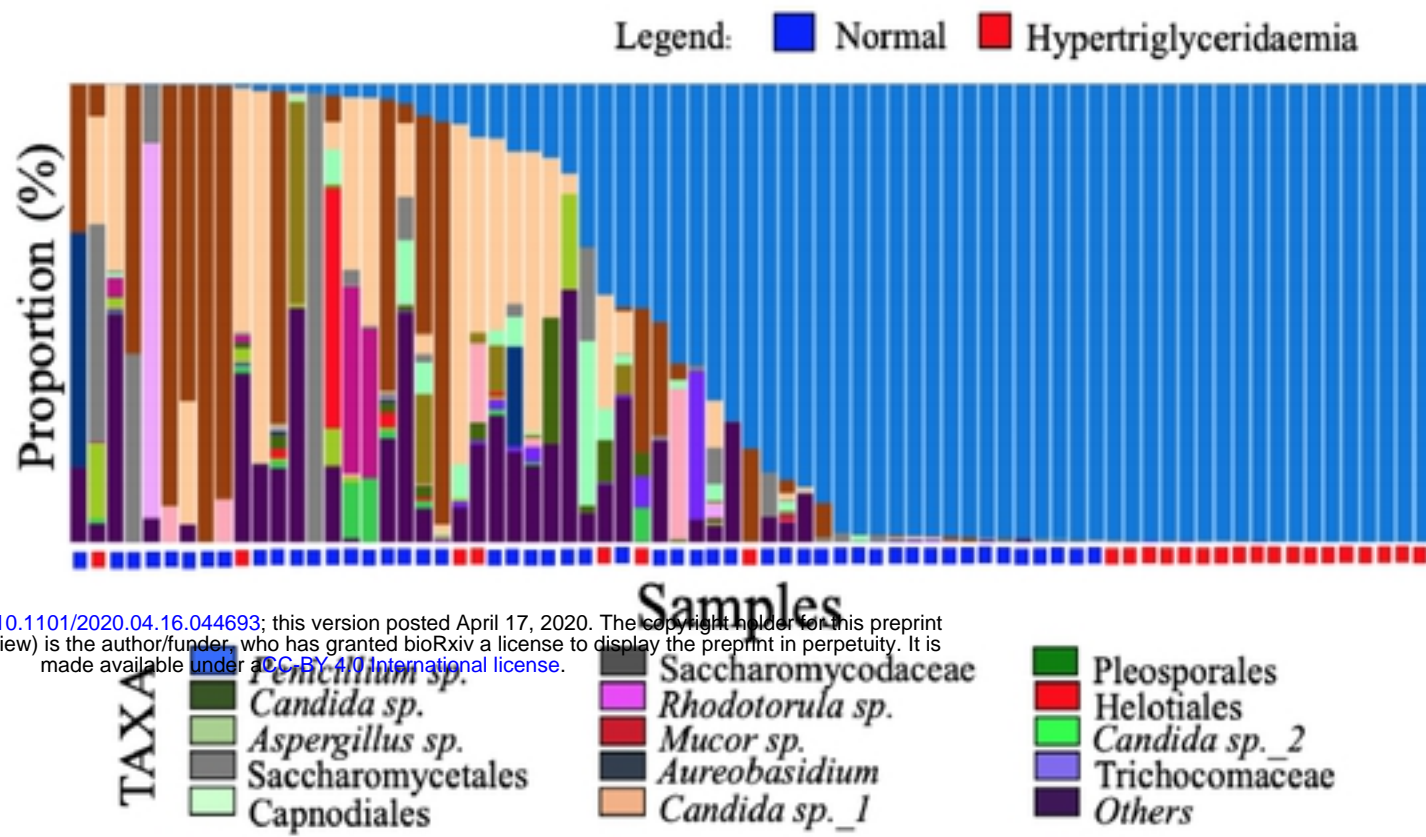

bioRxiv preprint doi: <https://doi.org/10.1101/2020.04.16.044693>; this version posted April 17, 2020. The copyright holder for this preprint (which was not certified by peer review) is the author/funder, who has granted bioRxiv a license to display the preprint in perpetuity. It is made available under aCC-BY 4.0 International license.

ii)

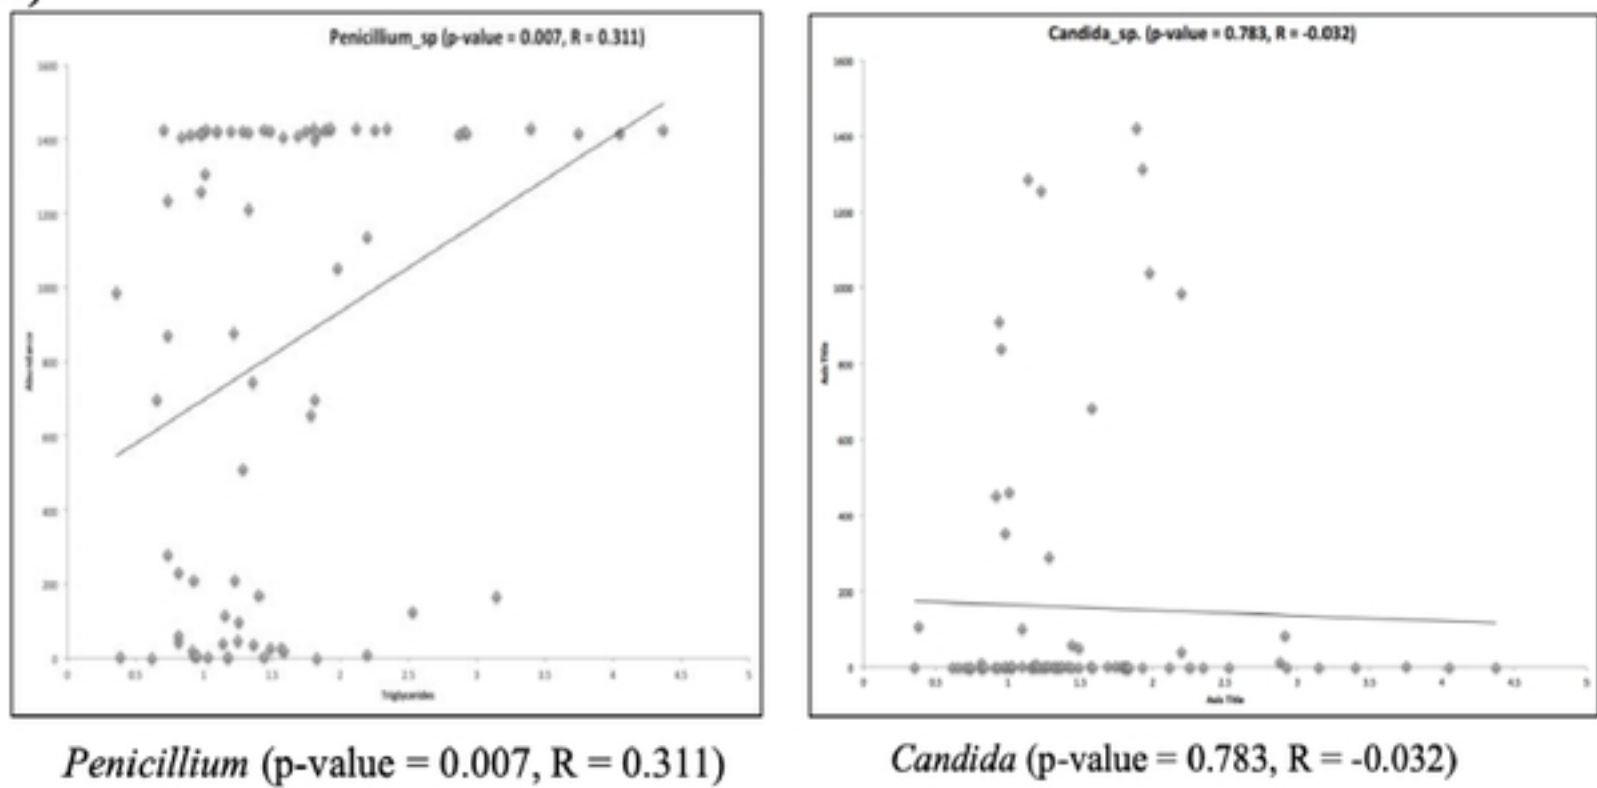

iii)

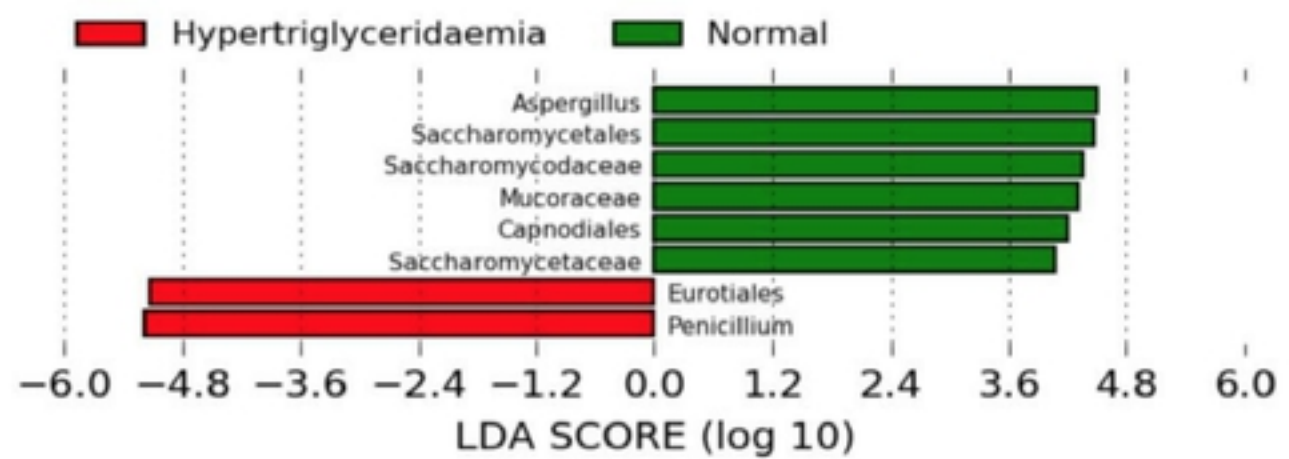

**Figure 3:** Dysbiosis patterns of the gut mycobiome. i) Gut mycobiome composition (relative abundance) of elderly Danes based as determined by ITS2 high throughput amplicon sequencing. ii) Correlation between the top most abundant taxa with Tg levels. The Spearman Rank probability (P) and correlation (R) are shown in the graphs. iii) LEfSe was conducted to explore potential mycobiome differences between NG and HG groups. LDA Score was constructed, and the bar represents a log<sub>10</sub> transformed LDA score. The red color represents taxa that corresponding to HG, and the green color represents NG. All taxa presented are significant,  $p < 0.05$  confirmed by alpha value for the factorial Kruskal-Wallis test among classes, and the discriminative threshold was set  $> 2.0$ .

bioRxiv preprint doi: <https://doi.org/10.1101/2020.04.16.044693>; this version posted April 17, 2020. The copyright holder for this preprint (which was not certified by peer review) is the author/funder, who has granted bioRxiv a license to display the preprint in perpetuity. It is made available under aCC-BY 4.0 International license.

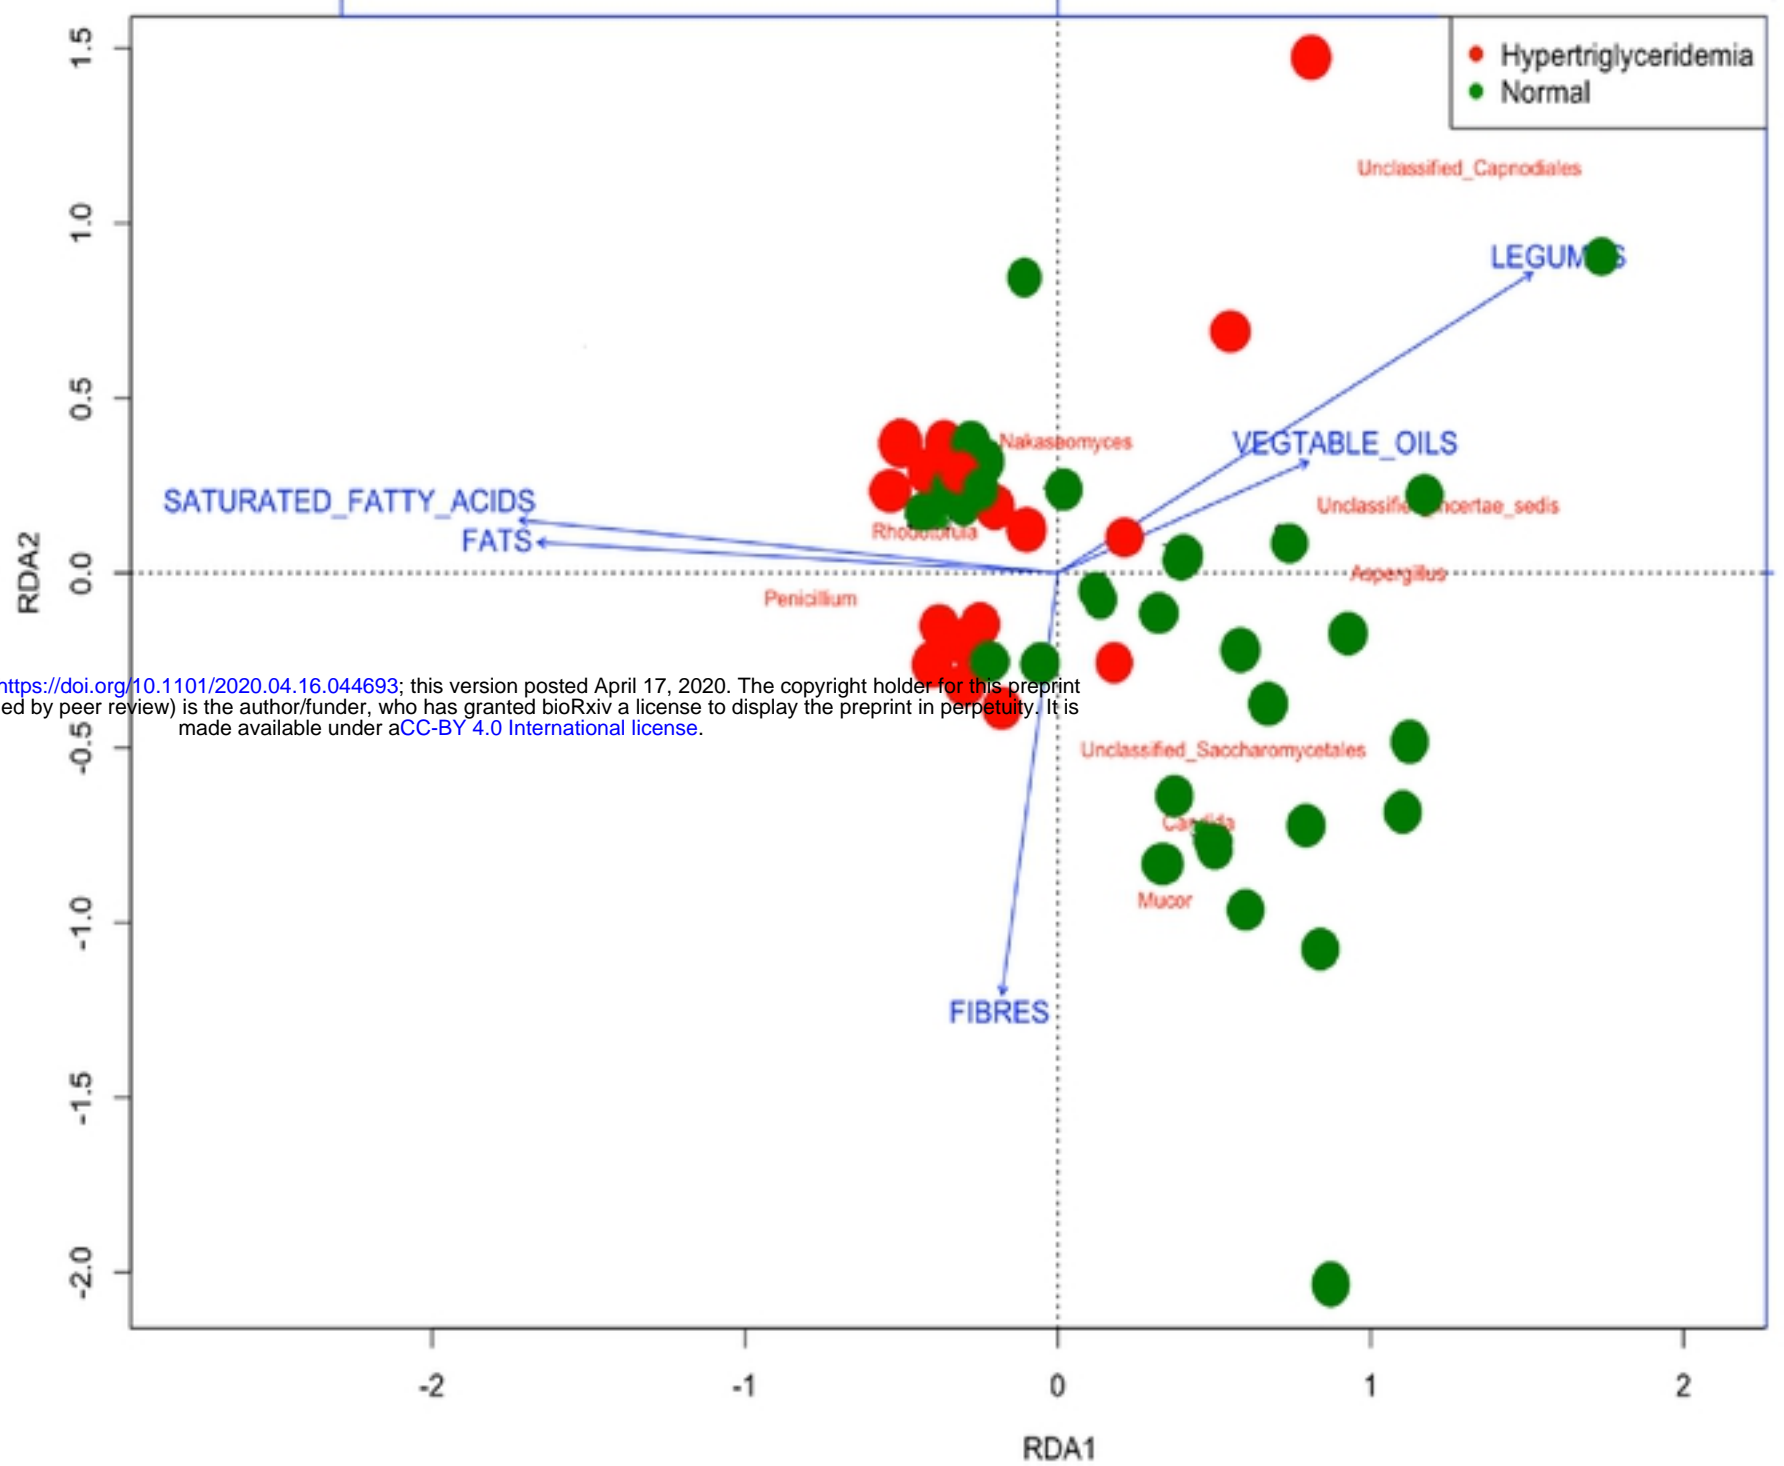

**Figure 4:** RDA biplot at OTU level with Hellinger-transformed data. Red dots represent individuals with high Tg levels (Hypertriglyceridemia, HG) and green dots, individuals with normal Tg levels. Cut-off for plotted factors was ANOVA with Bonferroni correction,  $p < 0.05$ .

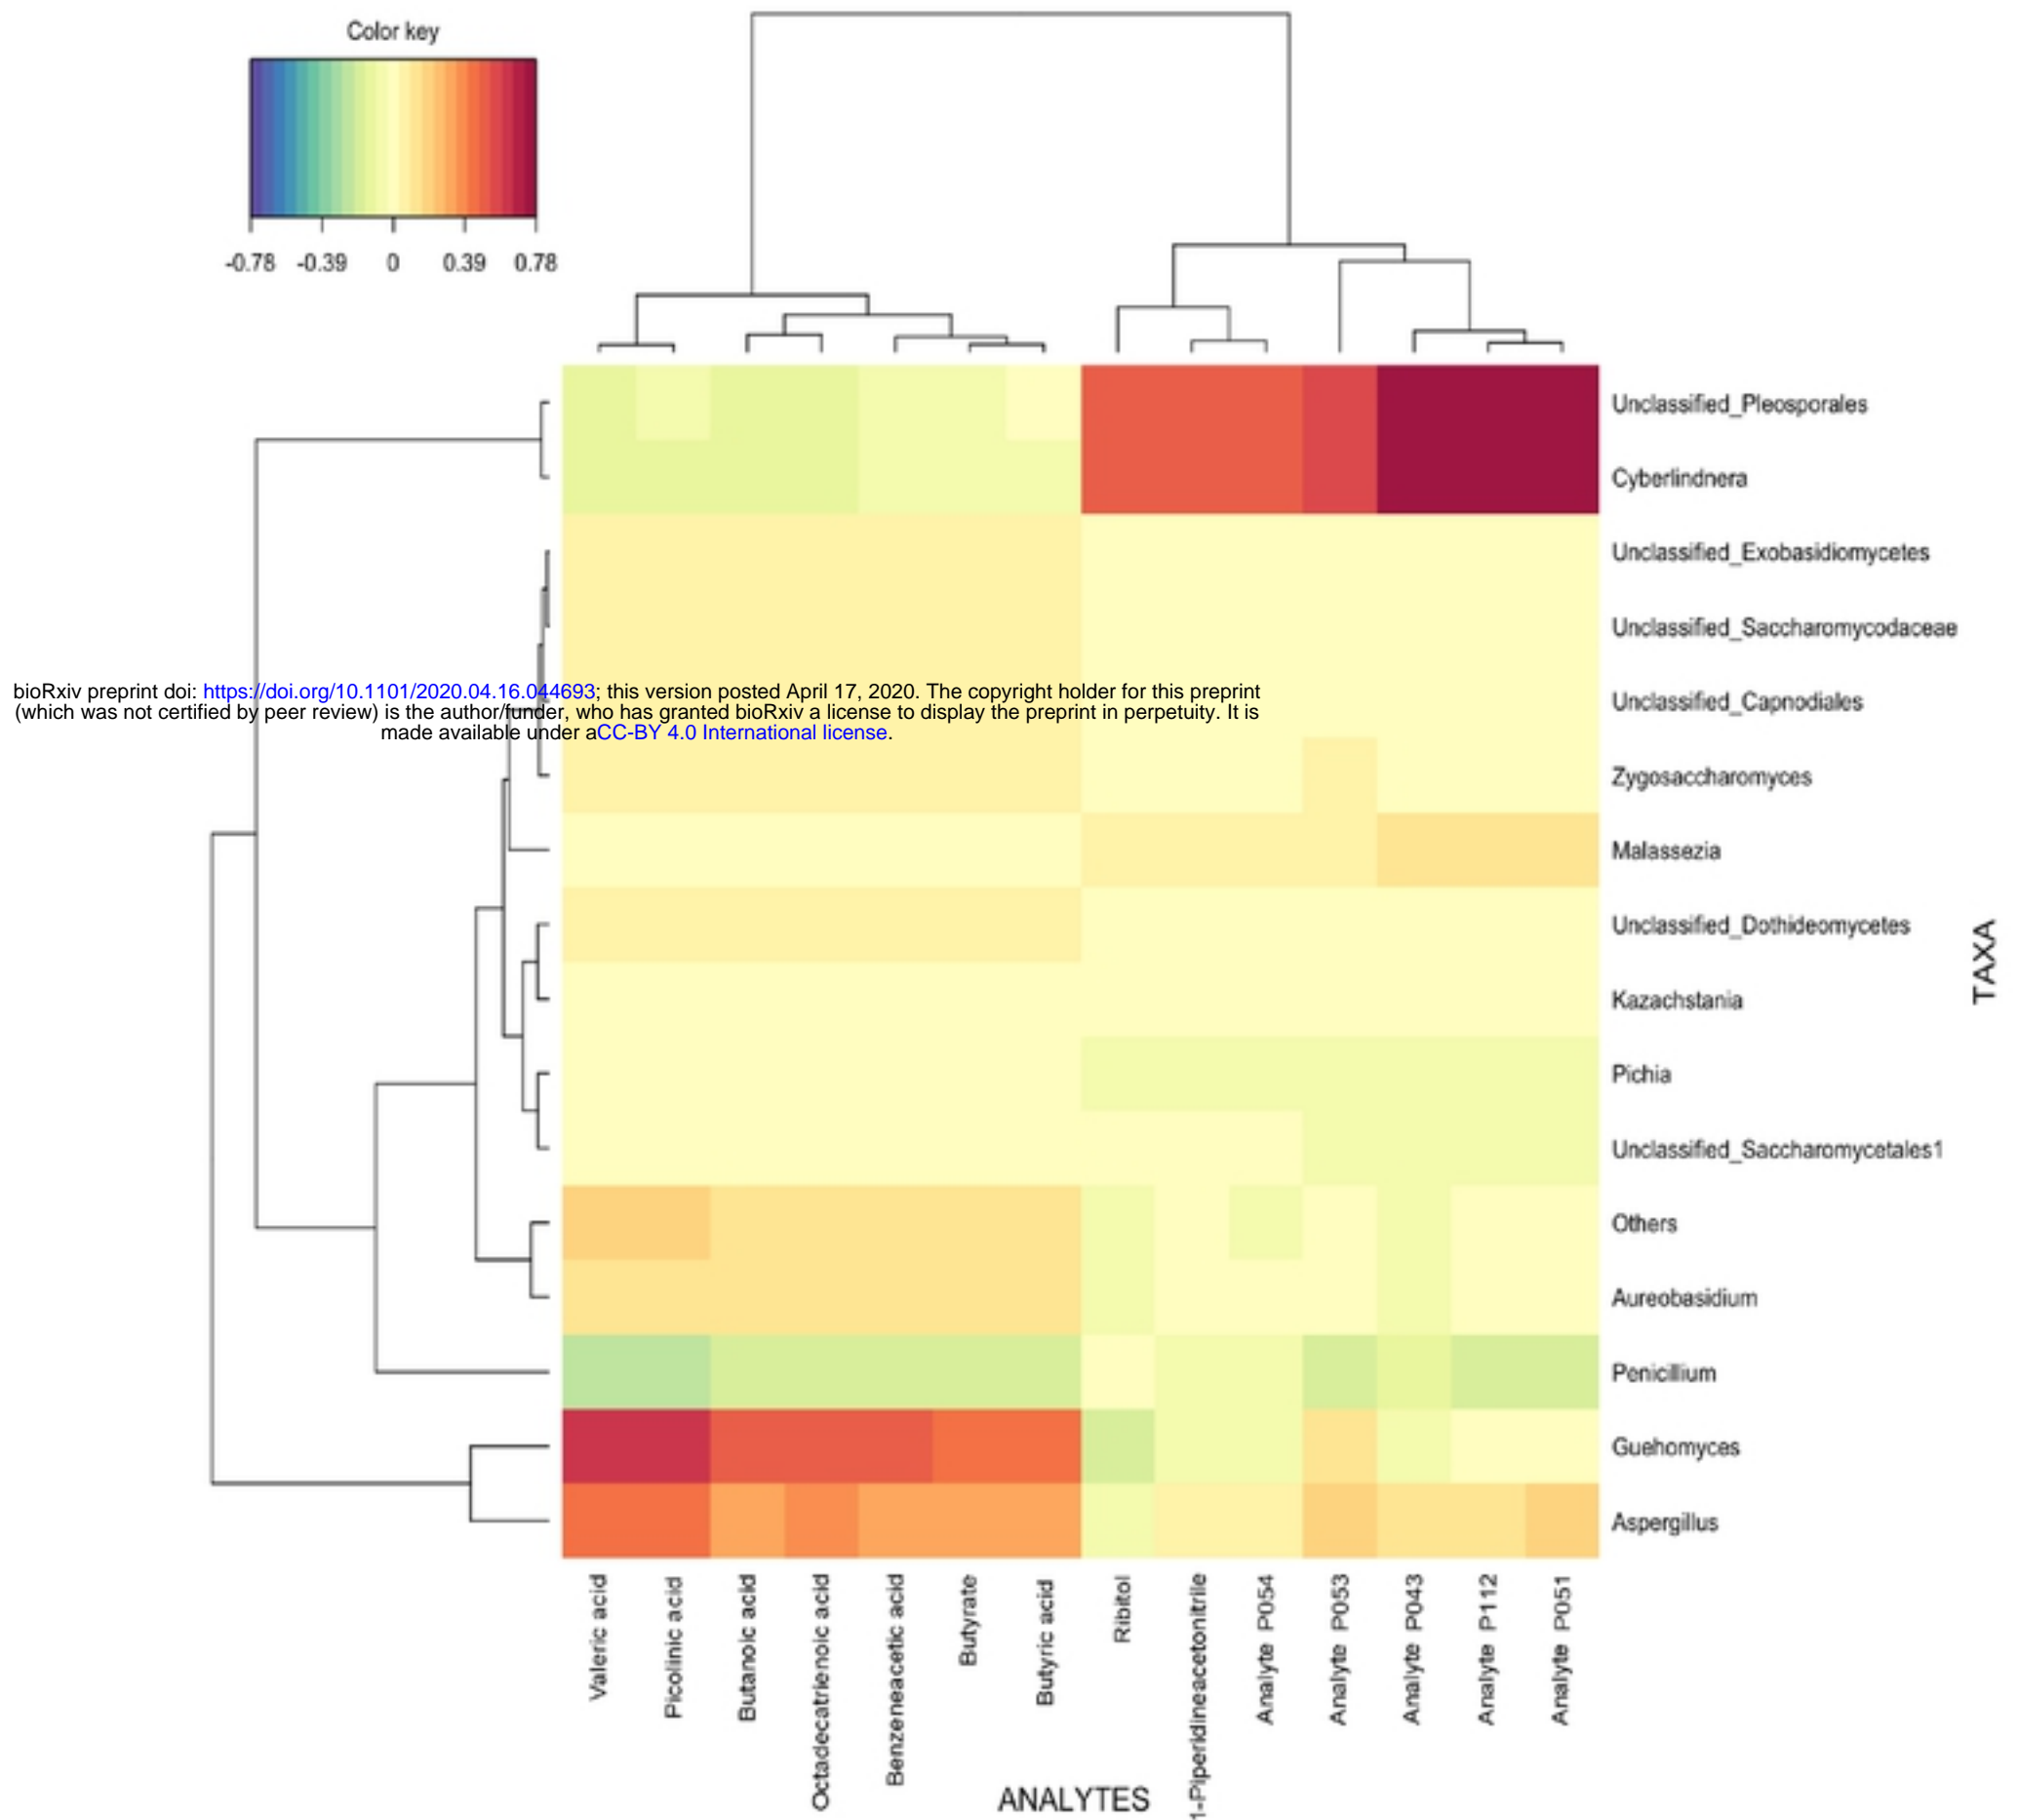

**Figure 5:** Sparse partial least squared correlations (sPLS) for mycobiome and untargeted faecal metabolomes. sPLS in regression mode (predict Y from X) to model a causal relationship between the most relevant of fungal genera and metabolites from serum and stool. Heatmap displaying the relative accumulation patterns using color-coding (green for negative correlation, and red for positive correlation) of 14 untargeted metabolites against 16 fungal communities.
